# Supplementary material for: Molecular Profiling of Acute and Chronic Rejections of Renal Allografts
Source: Hindawi journal article supplement (doi:10.1155/2013/509259), 2013-01-01
Supplement: f1 [file 509259.f1.pdf]

SUPPORTING TABLE S1: Genes evaluated by real-time quantitative PCR

|          |        |         |        |          |          |           |          |              |       |
|----------|--------|---------|--------|----------|----------|-----------|----------|--------------|-------|
| ADAMTSL3 | CALM2  | CCRL2   | CSF2   | GDF6     | IL15     | LAT;SPNS1 | PDGFB    | TGFB1        | XCR1  |
| AGR2     | CALM3  | CD14    | CSF2RB | GDF9     | IL16     | LBP       | PECAM1   | TGFB2        | YY1   |
| AGR3     | CASP1  | CD2     | CST7   | GNLY     | IL17A    | LCK       | PFN2     | TGFB3        | ZAP70 |
| AKT1     | CASP10 | CD27    | CTLA4  | GPR171   | IL18     | LEFTY1    | PPIF     | TGFBR1       |       |
| ANXA5    | CASP2  | CD28    | CTNNB1 | GZMA     | IL18R1   | LEFTY2    | PRF1     | TGFBR2       |       |
| ANXA7    | CASP3  | CD3D    | CX3CL1 | GZMB     | IL1A     | LTA       | PRL      | TGFBR3       |       |
| APAF1    | CASP6  | CD3E    | CX3CR1 | GZMH     | IL1B     | LTB       | PRLR     | TLR1         |       |
| APOA2    | CASP7  | CD3G    | CXCL1  | GZMK     | IL1R1    | LTBP1     | PTGS2    | TLR2         |       |
| APOH     | CASP8  | CD4     | CXCL10 | HIF1A    | IL1R2    | LTBP2     | PTPRC    | TLR3         |       |
| ATF1     | CASP9  | CD40    | CXCL11 | HLA-C    | IL1RAP   | LTBP4     | PTTG1    | TLR4         |       |
| ATF2     | CCL1   | CD40LG  | CXCL12 | HLA-DMA  | IL2      | LY96      | RAP1A    | TLR5         |       |
| ATF3     | CCL11  | CD53    | CXCL13 | HLA-DMB  | IL23A    | LYZ       | RB1      | TLR6         |       |
| ATP1A1   | CCL13  | CD55    | CXCL2  | HLA-DPA1 | IL24     | MANEA     | RBL2     | TLR7         |       |
| ATP5B    | CCL16  | CD59    | CXCL3  | HLA-DQA1 | IL2RA    | MAP3K5    | REL      | TLR9         |       |
| ATP5G3   | CCL17  | CD69    | CXCL5  | HLA-DQA2 | IL2RB    | MAPK8     | RELA     | TNF          |       |
| B2M      | CCL18  | CD70    | CXCL6  | HLA-DRA  | IL3      | ME2       | RELB     | TNFRSF10A    |       |
| BAD      | CCL19  | CD74    | CXCL9  | HLA-E    | IL4      | MMP2      | RGN      | TNFRSF10B    |       |
| BATF     | CCL2   | CD79A   | CXCR3  | HMOX1    | IL4R     | MMP7      | RGS13    | TNFRSF11B    |       |
| BAX      | CCL21  | CD79B   | CXCR4  | HRSP12   | IL5      | MMP9      | RRM2     | TNFRSF18     |       |
| BCL2     | CCL22  | CD80    | CXCR6  | CHODL    | IL6      | MPL       | SERPINA3 | TNFRSF1A     |       |
| BCL2L11  | CCL23  | CD81    | CYCS   | ICAM1    | IL6R     | MS4A1     | SMAD1    | TNFRSF1B     |       |
| BDNF     | CCL24  | CD86    | DFFA   | ICOS     | IL7      | MYD88     | SMAD2    | TNFRSF21     |       |
| BFAR     | CCL3   | CD8A    | DIABLO | ICOSLG   | IL7R     | NCK1      | SMAD3    | TNFRSF25     |       |
| BID      | CCL4   | CD9     | EEF1A1 | IFNA1    | IL8      | NCK2      | SMAD4    | TNFRSF9      |       |
| BMP1     | CCL5   | CDC20   | EFHD1  | IFNB1    | IL8RA    | NEGR1     | SMAD5    | TNFSF10      |       |
| BMP2     | CCL7   | CDH17   | EIF4A2 | IFNG     | IL8RB    | NEK2      | SMAD9    | TNFSF14      |       |
| BMP3     | CCL8   | CDK2AP1 | FABP1  | IFNGR1   | IL9      | NFAT5     | SMURF1   | TNFSF4       |       |
| BMP4     | CCNA2  | CEBPB   | FADD   | IFNGR2   | IL9R     | NFATC1    | SNAP25   | TOLLIP       |       |
| BMP5     | CCNB1  | CFLAR   | FAS    | IFNK     | INHBA    | NFATC2    | SOCS1    | TP53         |       |
| BMP6     | CCNB2  | CKS1B   | FASLG  | IGF1     | INHBA    | NFATC3    | SOCS2    | TP53BP2      |       |
| BMP7     | CCR1   | CKS2    | FCER1A | IGF1R    | ITGA2    | NFATC4    | SOCS5    | TPSB2;TPSAB1 |       |
| BMP8B    | CCR10  | CLEC7A  | FIGF   | IGF2     | ITGB2    | NFKB1     | SPP1     | TRADD        |       |
| BRAF     | CCR2   | CLTB    | FOS    | IGLL1    | ITK      | NLGN4X    | STAT1    | TRAF2        |       |
| C1S      | CCR3   | COL1A1  | FOXP3  | IL10     | JAK1     | NMI       | STAT2    | TRAF3        |       |
| C3       | CCR4   | COL1A2  | GABRP  | IL10RA   | JAK2     | NOS3      | STAT3    | TSPAN1       |       |
| C3AR1    | CCR5   | COL3A1  | GATM   | IL10RB   | JUN      | ORM2      | STAT4    | TSPAN3       |       |
| C4A;C4B  | CCR6   | CPA3    | GBP1   | IL12A    | JUNB     | OXCT1     | STAT5A   | TYK2         |       |
| C7       | CCR7   | CREB1   | GCA    | IL12B    | KIAA0101 | PAPLN     | STAT5B   | UBD          |       |
